# Supplementary material for: Molecular dynamics and free energy studies on Aurora kinase A and its mutant bound with MLN8054: insight into molecular mechanism of subtype selectivity
Source: Royal Society of Chemistry journal article supplement (doi:10.1039/c2mb25217a), 2012-08-24
Supplement: c2mb25217a.pdf [file c2mb25217a.pdf]

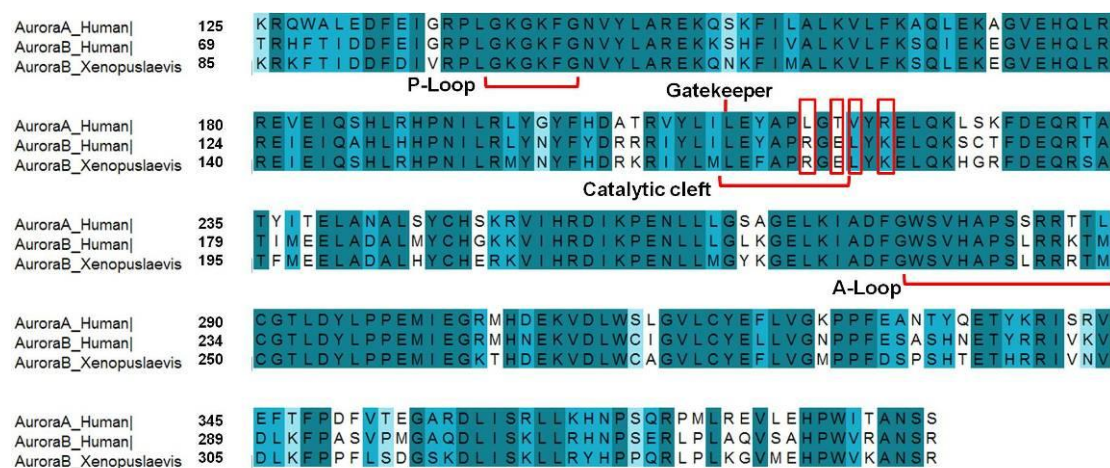

Figure S1. Sequence alignment of human Aurora-A, human Aurora-B and *Xenopus laevis* Aurora-B protein kinases. The four residues of the active site that are not identical between Aurora-A and -B are enclosed in the red boxes.

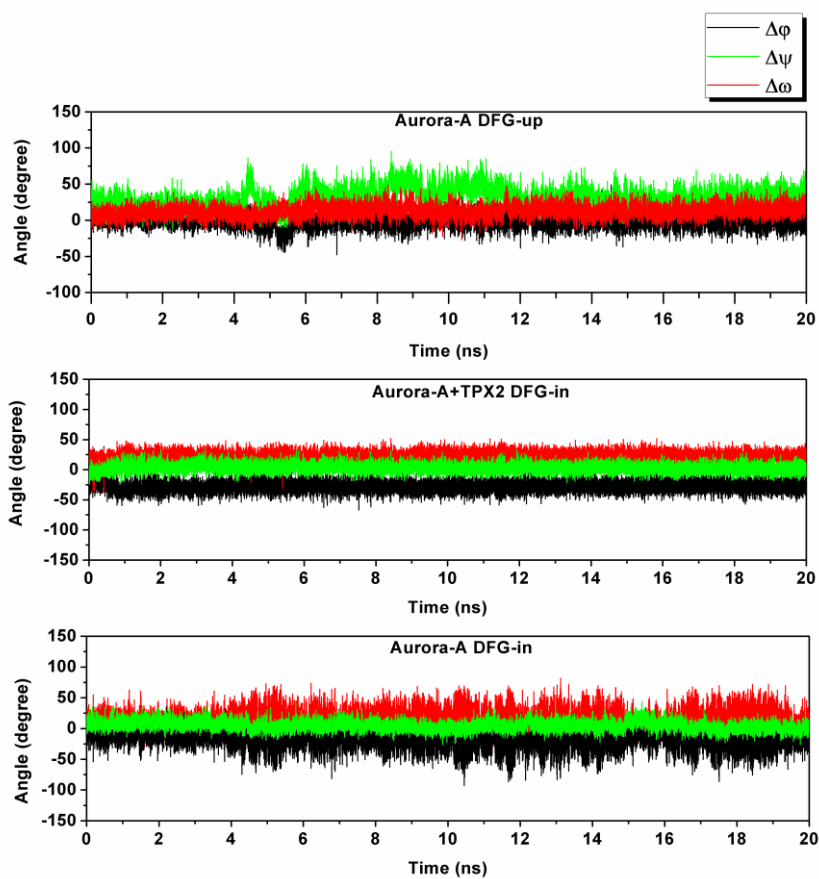

(a)

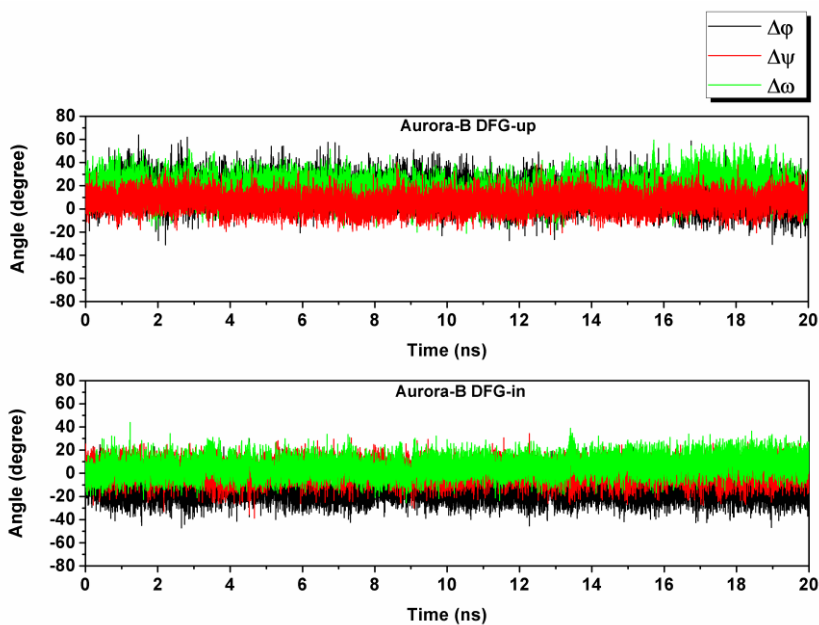

(b)

Figure S2. The differences  $\Delta\phi$ ,  $\Delta\psi$  and  $\Delta\omega$  between the values of MD and crystal structure for 20 ns simulation.

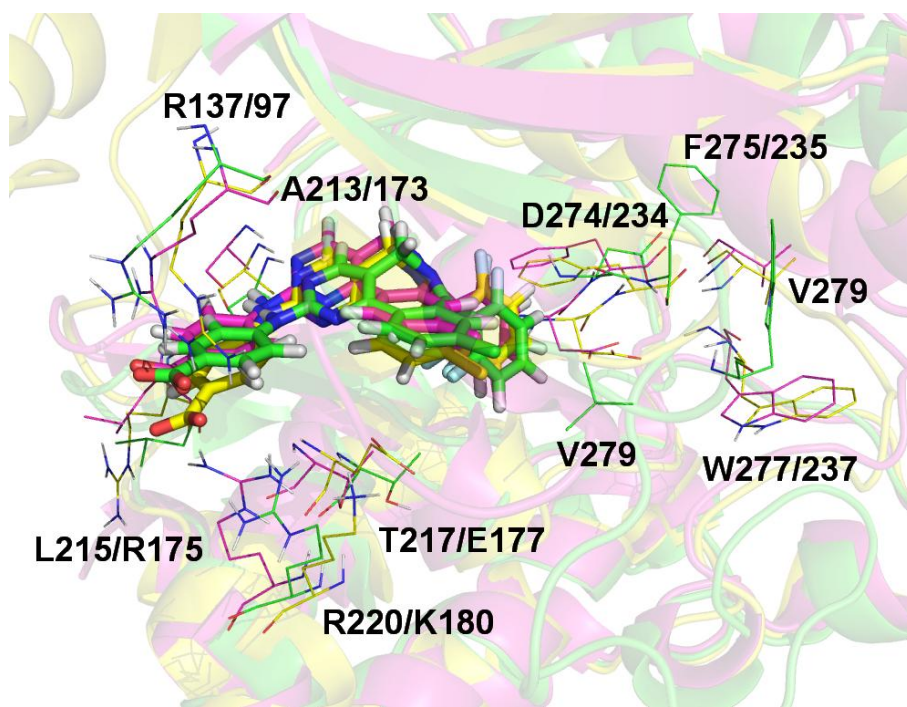

(a)

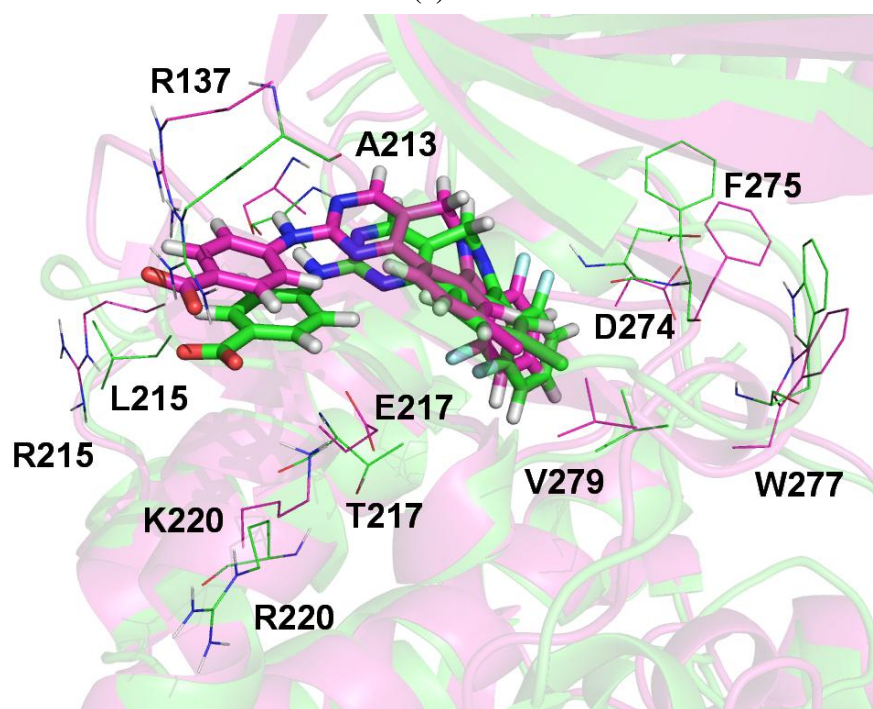

(b)

Figure S3. (a) Superposition of the DFG-up forms of Aurora-A and -B (b) Superposition of the DFG-up form of Aurora-A with the DFG-in forms of Aurora-A and -B for the average structures obtained from MD simulation.
